# Supplementary material
Source: PubMed Central journal article supplement (PMC2527748)

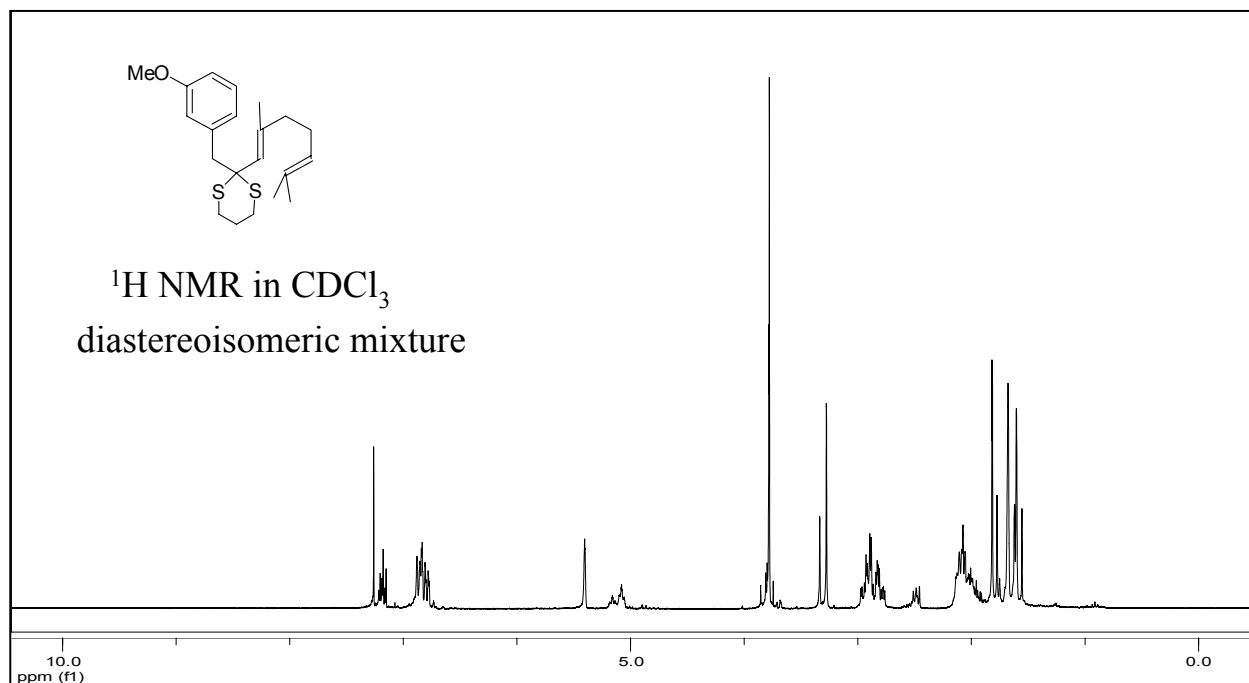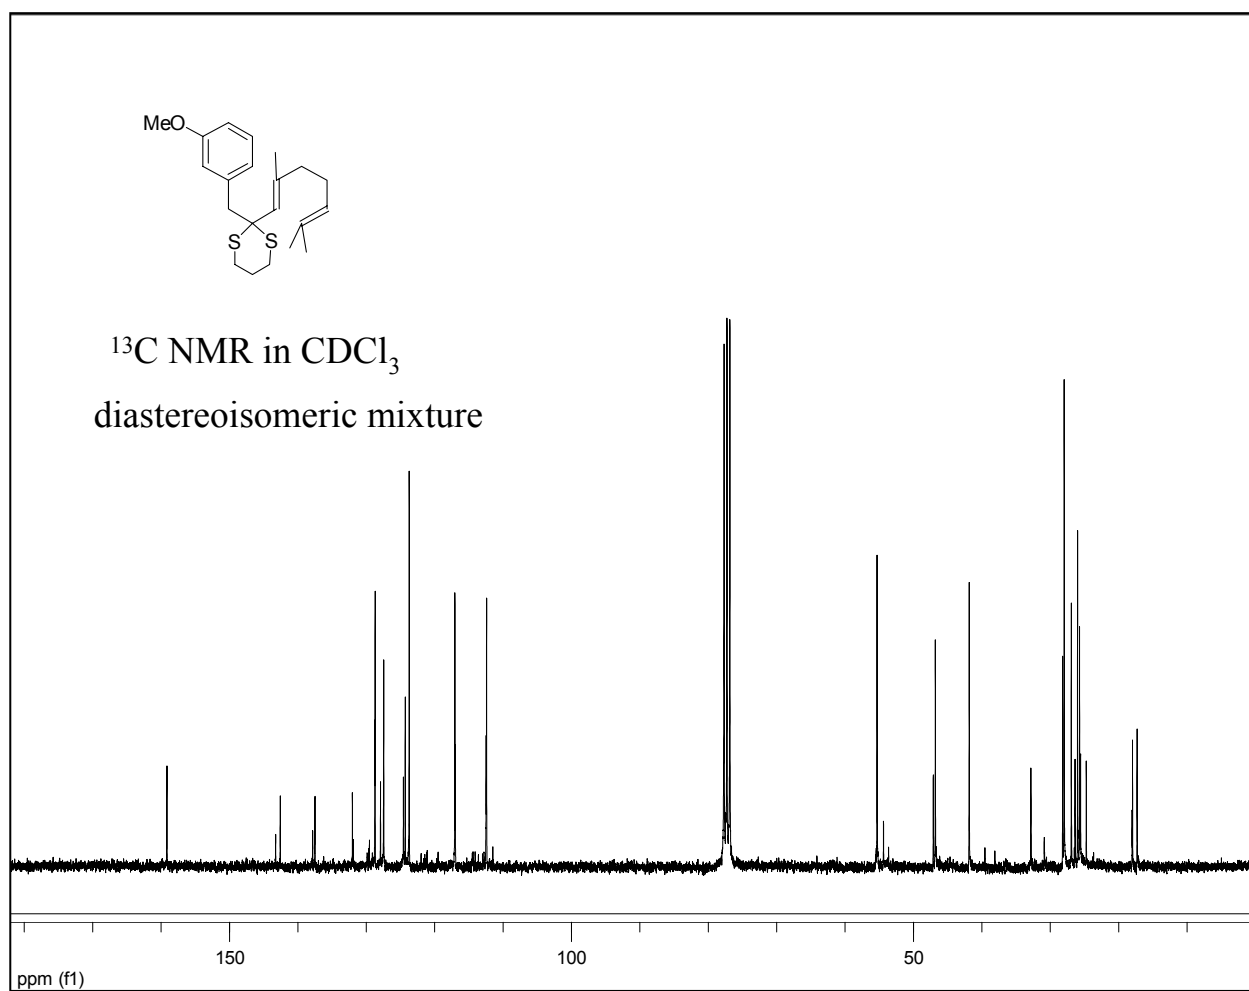

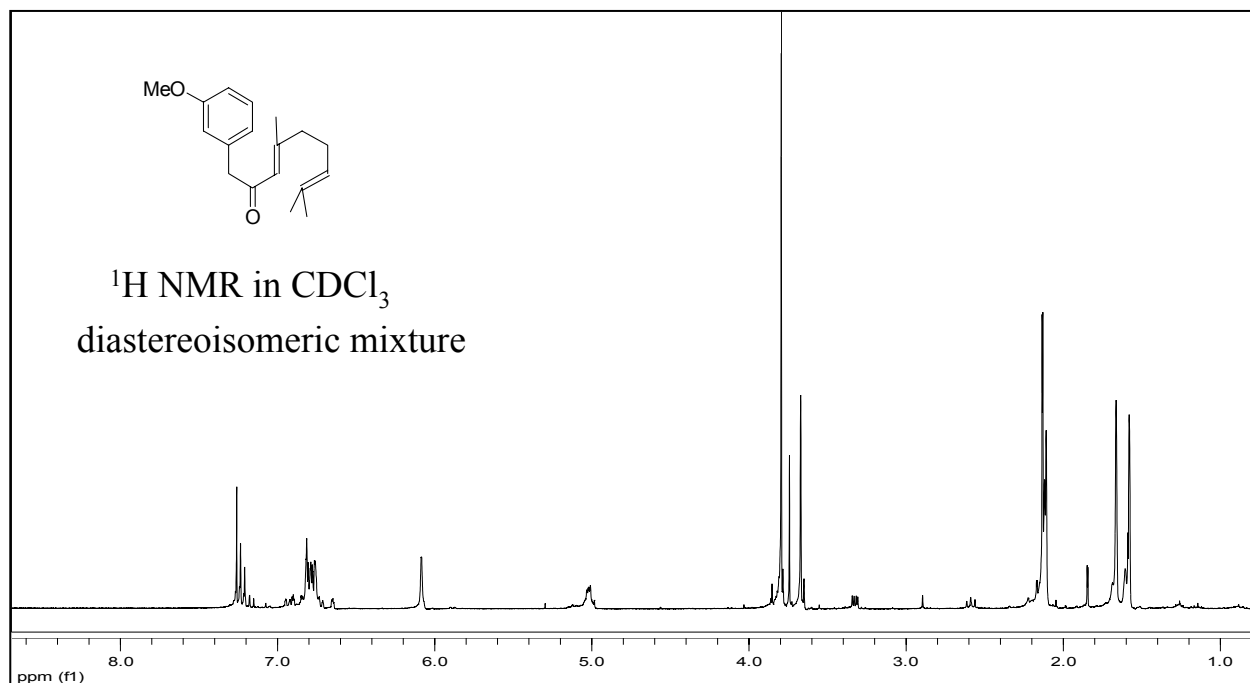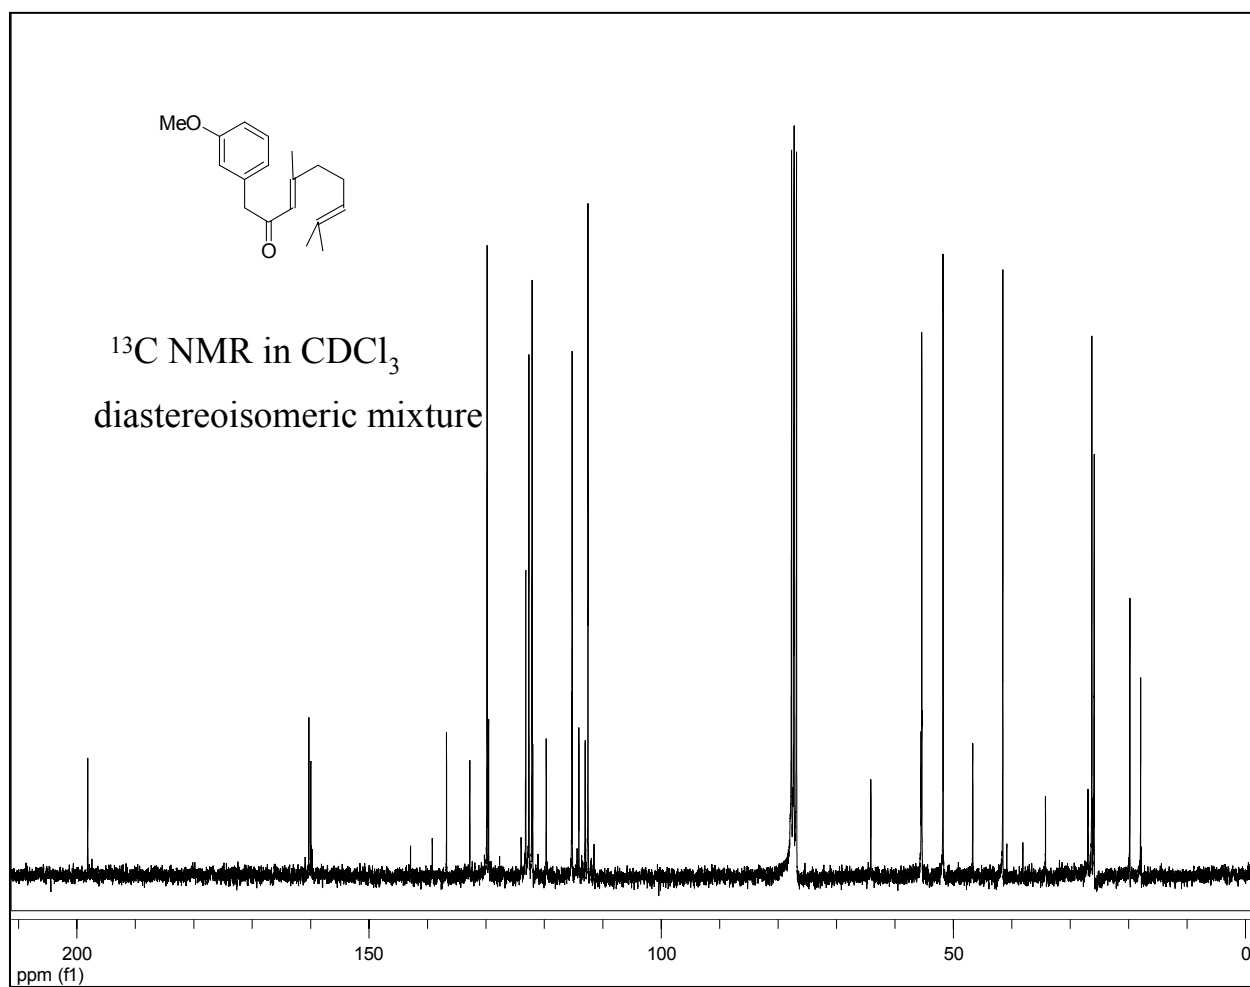

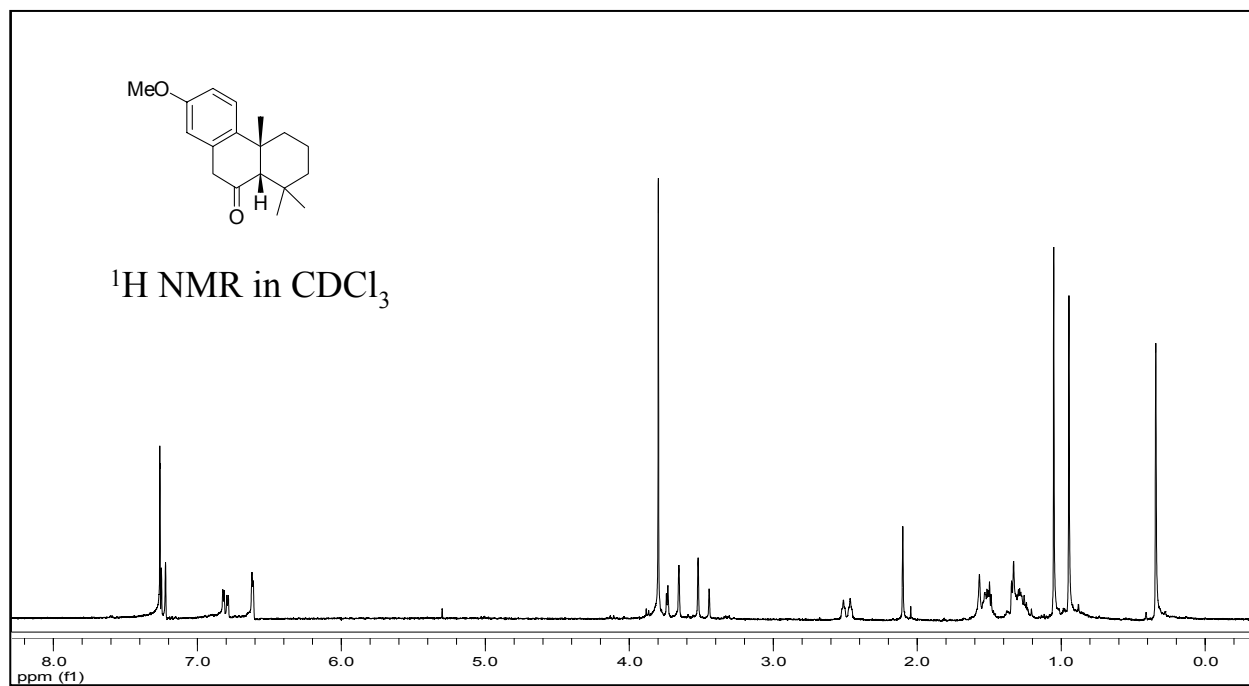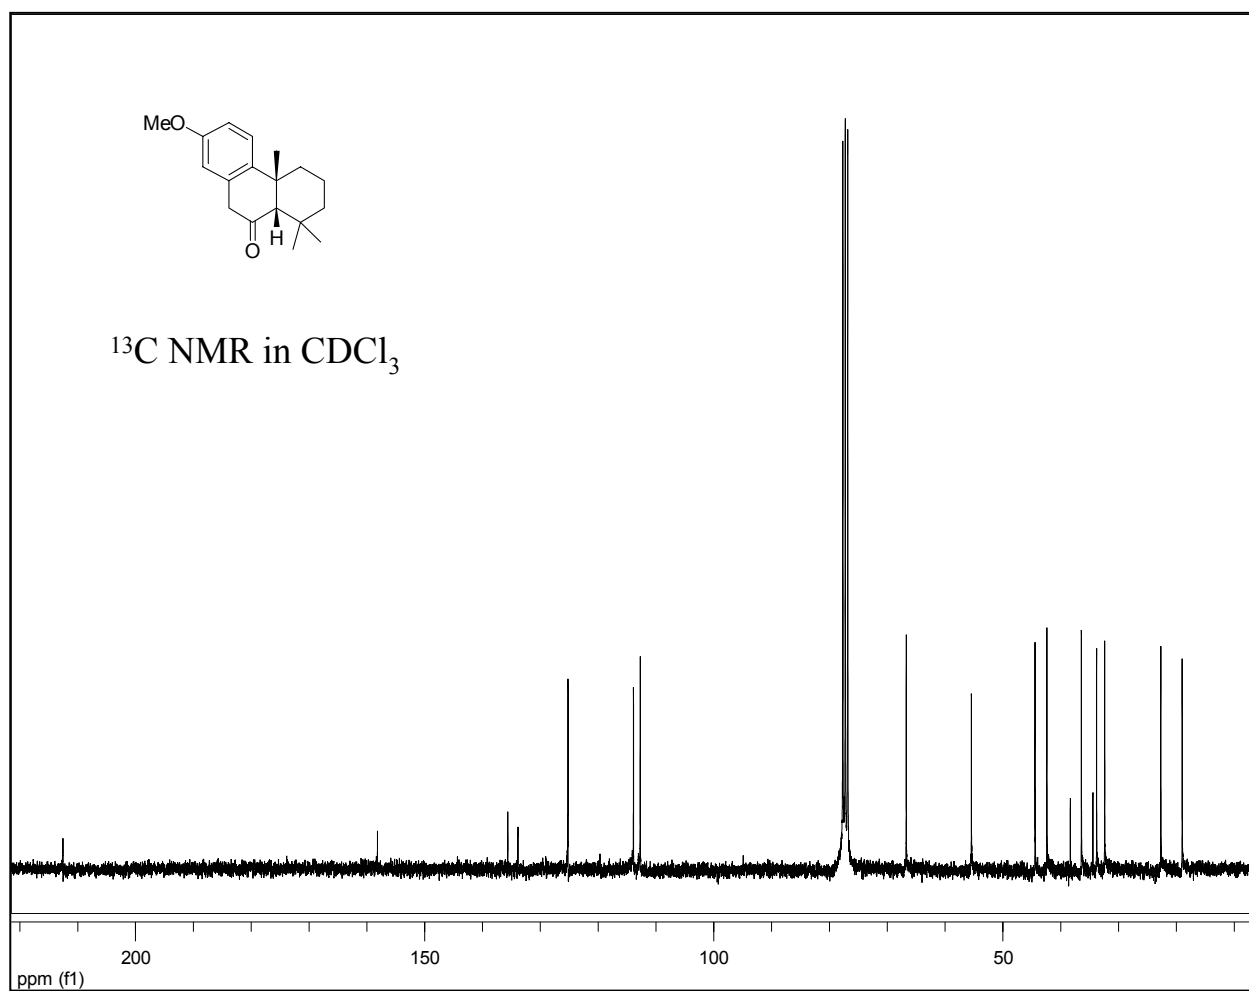

ROESY Analysis of the cis-conformation of terpenone 1

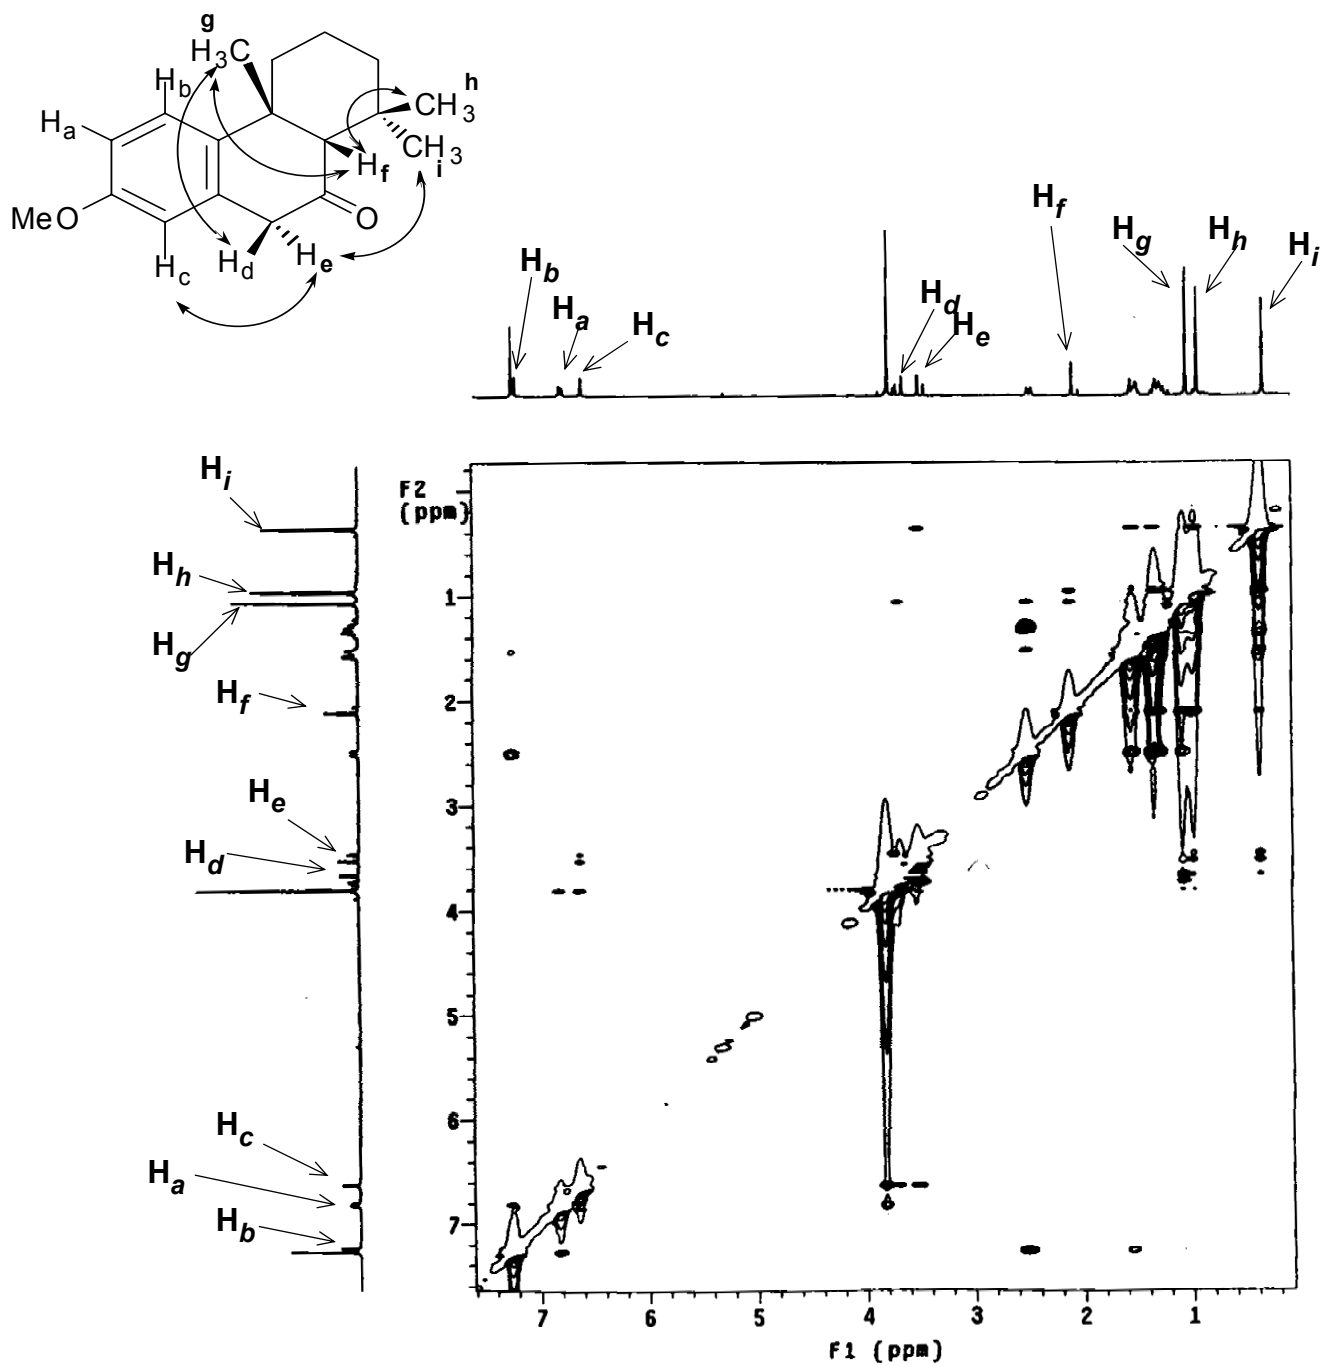

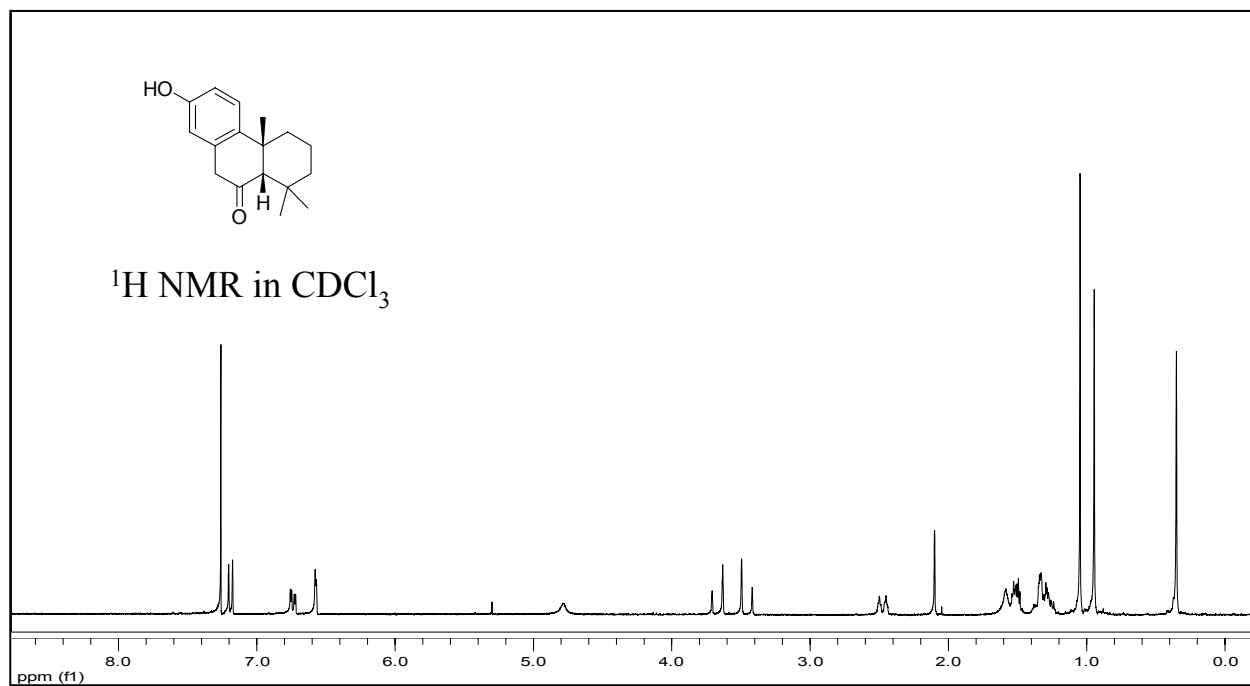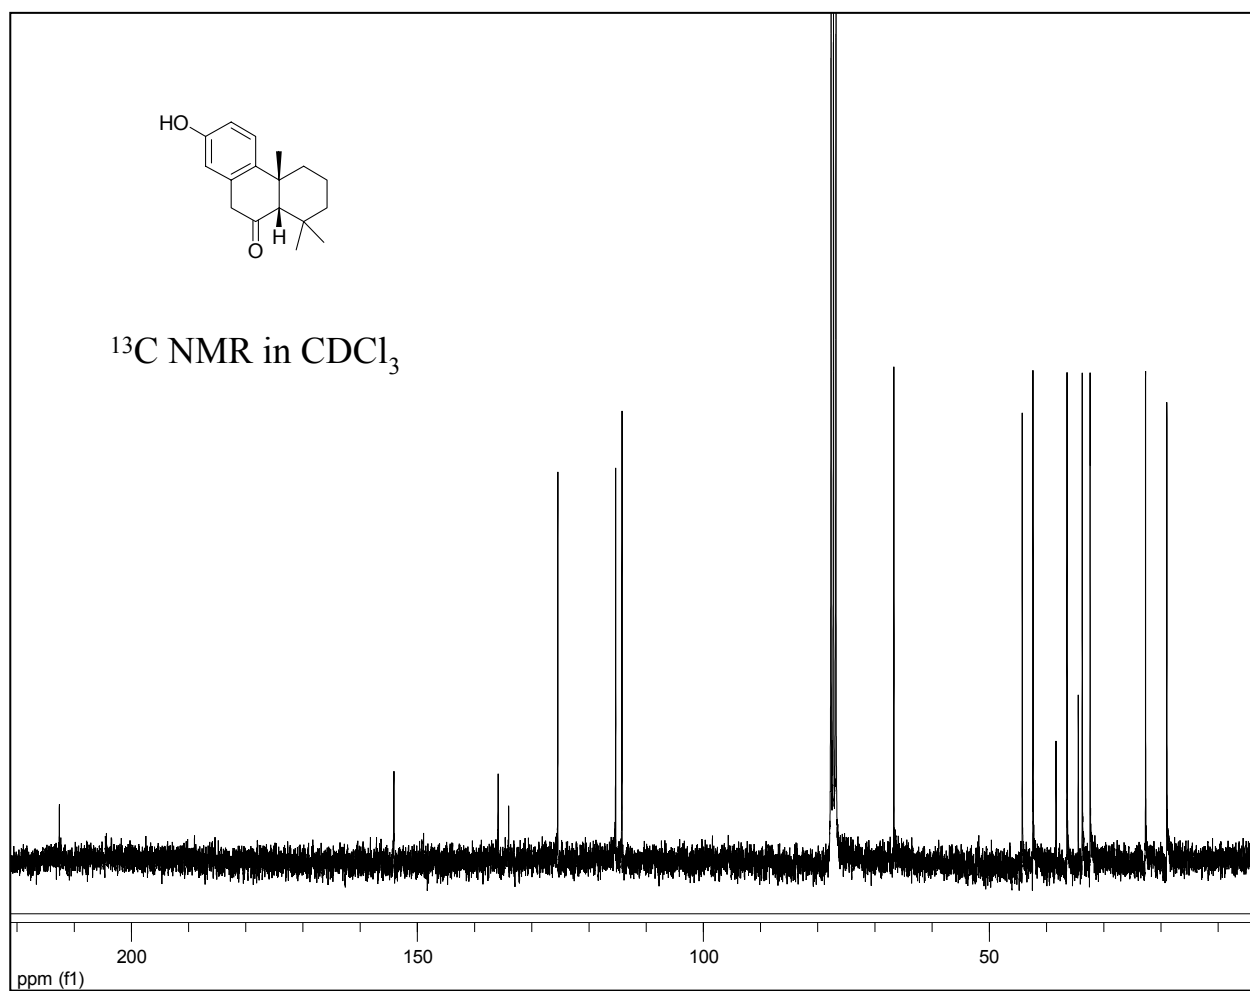

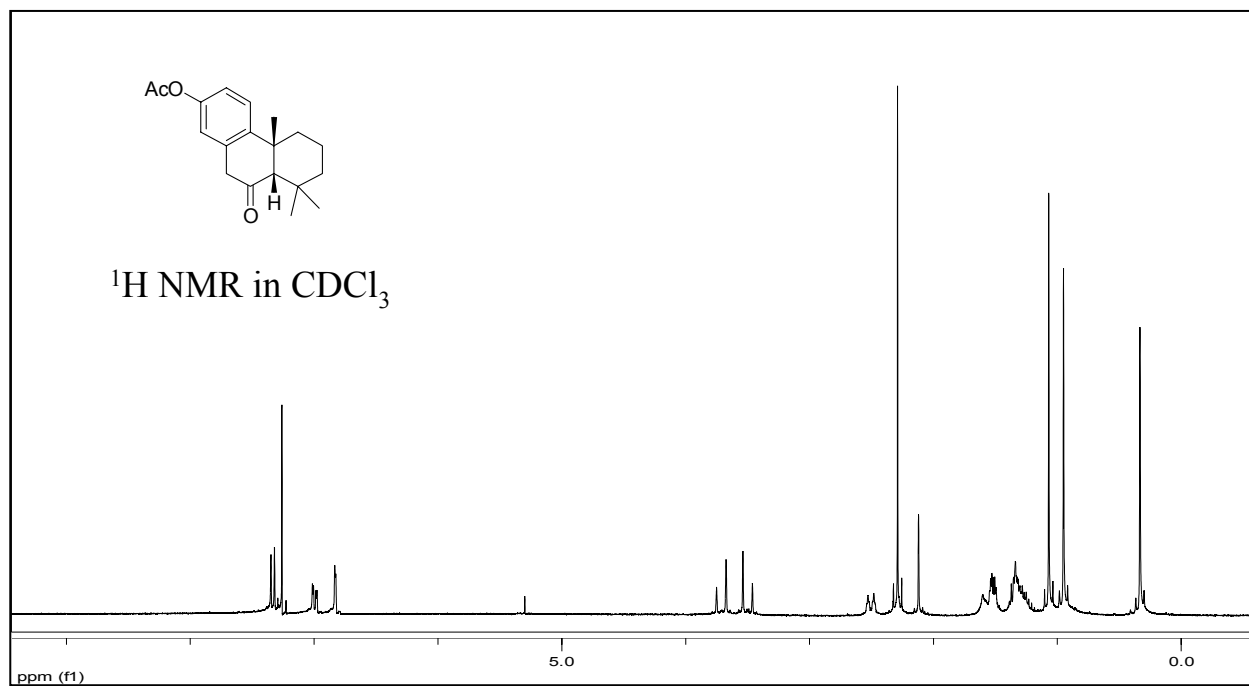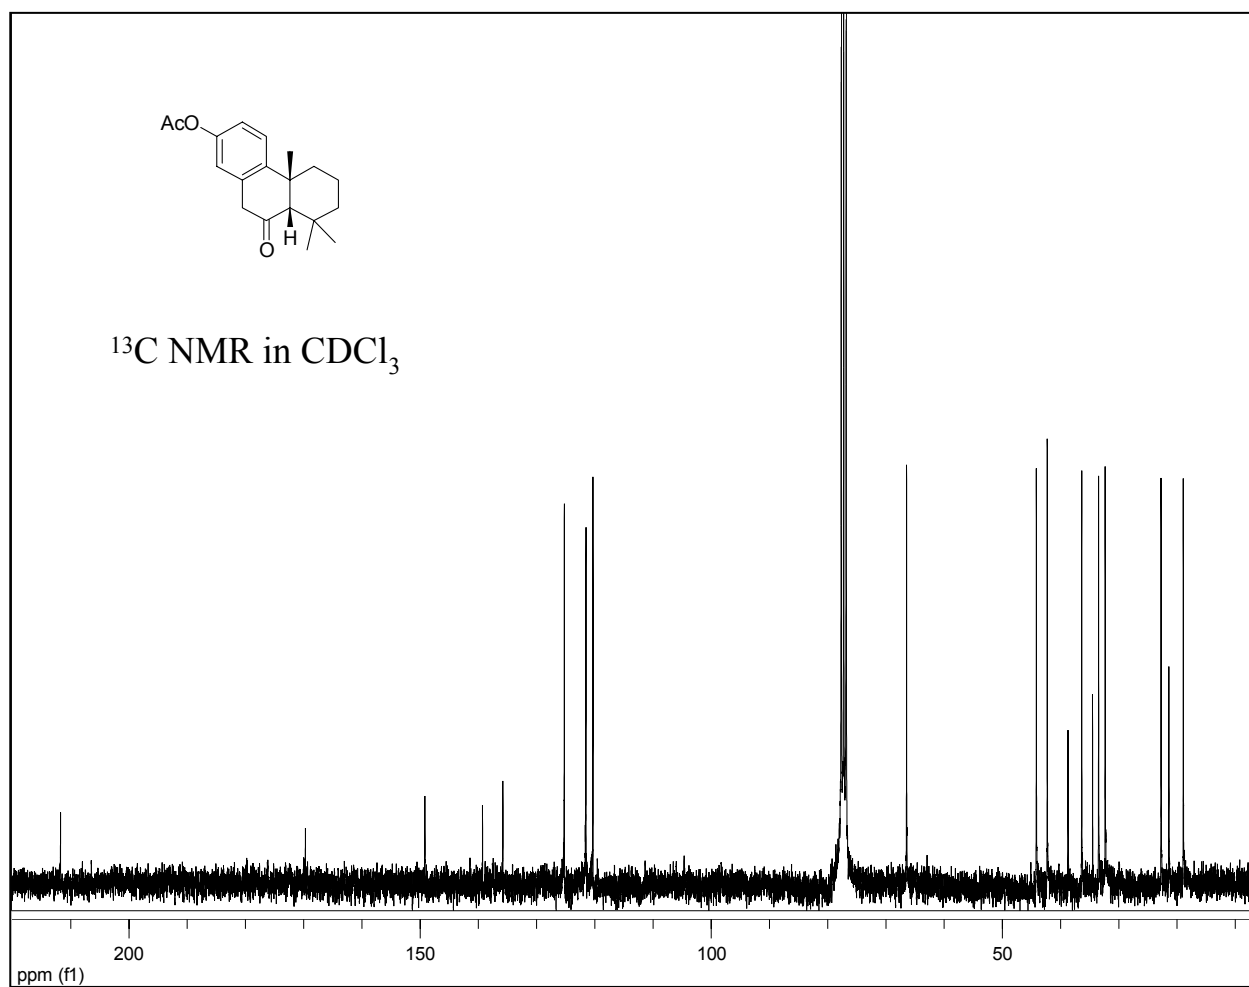

Supplement: NIHMS61515-supplement-si20060616_100.pdf [file NIHMS61515-supplement-si20060616_100.pdf]
